# Supplementary material for: Predicting Drug Release Rate of Implantable Matrices and Better Understanding of the Underlying Mechanisms through Experimental Design and Artificial Neural Network-Based Modelling
Source: MDPI journal article supplement (doi:10.3390/pharmaceutics14020228), 2022-01-19
Supplement: s1 [file s1]

# Supplementary Material: Predicting Drug Release Rate of Implantable Matrices and Better Understanding of the Underlying Mechanisms through Experimental Design and Artificial Neural Network-Based Modelling

Ernő Benkő, Ilija German Ilić, Katalin Kristó, Géza Regdon Jr., Ildikó Csóka, Klára Pintye-Hódi, Stane Srčič and Tamás Sovány \*

Table S1. Dataset of the ANN modelling.

| Subset        | Drug | Drug solubility (mg/ml) | Drug pKa | Excipient  | Excipient amount | Excipient solubility (mg/ml) | Excipient pKa | Compression pressure (MPa) | Hardness (N) | Porosity | Peak shift | Release rate | Release exponent | 15 min | 30 min | 60 min | 120 min | 240 min | 480 min | 1440 min |
|---------------|------|-------------------------|----------|------------|------------------|------------------------------|---------------|----------------------------|--------------|----------|------------|--------------|------------------|--------|--------|--------|---------|---------|---------|----------|
| 1 Train       | Par. | 19,5                    | 9,46     | Eudragit L | 22               | 0,03                         | 4,6           | 75                         | 15           | 0,307    | 3          | 5,79         | 0,39             | 6,06   | 9,63   | 12,81  | 16,80   | 27,32   | 43,19   | 66,47    |
| 2 Validation  | Par. | 19,5                    | 9,46     | Eudragit L | 22               | 0,03                         | 4,6           | 225                        | 114,3        | 0,136    | 3          | 1,50         | 0,56             | 3,20   | 6,58   | 9,23   | 14,68   | 22,88   | 39,68   | 73,09    |
| 3 Test        | Par. | 19,5                    | 9,46     | Eudragit L | 22               | 0,03                         | 4,6           | 375                        | 109,1        | 0,118    | 3          | 1,72         | 0,53             | 4,71   | 6,91   | 10,14  | 19,76   | 29,50   | 39,30   | 67,22    |
| 4 Train       | Par. | 19,5                    | 9,46     | Eudragit L | 33               | 0,03                         | 4,6           | 75                         | 18,7         | 0,29     | 6          | 6,87         | 0,35             | 7,31   | 12,17  | 21,78  | 41,80   | 63,28   | 72,20   | 79,28    |
| 5 Test        | Par. | 19,5                    | 9,46     | Eudragit L | 33               | 0,03                         | 4,6           | 225                        | 95,8         | 0,122    | 6          | 1,60         | 0,54             | 4,52   | 6,22   | 10,77  | 21,65   | 31,56   | 50,28   | 77,27    |
| 6 Train       | Par. | 19,5                    | 9,46     | Eudragit L | 33               | 0,03                         | 4,6           | 375                        | 133,6        | 0,111    | 6          | 1,55         | 0,56             | 3,34   | 6,98   | 10,17  | 18,91   | 36,13   | 59,22   | 86,65    |
| 7 Validation  | Par. | 19,5                    | 9,46     | Eudragit L | 44               | 0,03                         | 4,6           | 75                         | 28,2         | 0,306    | 13         | 1,72         | 0,51             | 3,32   | 10,55  | 26,95  | 42,46   | 57,16   | 72,80   | 87,48    |
| 8 Validation  | Par. | 19,5                    | 9,46     | Eudragit L | 44               | 0,03                         | 4,6           | 225                        | 132,6        | 0,118    | 13         | 0,76         | 0,63             | 3,82   | 6,86   | 12,57  | 18,93   | 35,31   | 55,68   | 87,21    |
| 9 Train       | Par. | 19,5                    | 9,46     | Eudragit L | 44               | 0,03                         | 4,6           | 375                        | 153,8        | 0,091    | 13         | 1,51         | 0,52             | 5,37   | 8,14   | 10,77  | 21,18   | 36,54   | 50,66   | 81,78    |
| 10 Train      | Par. | 19,5                    | 9,46     | Eudragit E | 22               | 0,01                         | 10            | 75                         | 113,6        | 0,223    | 9          | 0,90         | 0,57             | 5,95   | 9,48   | 12,63  | 16,52   | 26,86   | 42,46   | 65,35    |
| 11 Validation | Par. | 19,5                    | 9,46     | Eudragit E | 22               | 0,01                         | 10            | 225                        | 166,6        | 0,126    | 9          | 0,68         | 0,58             | 3,98   | 3,97   | 7,68   | 11,63   | 15,83   | 22,96   | 43,10    |
| 12 Train      | Par. | 19,5                    | 9,46     | Eudragit E | 22               | 0,01                         | 10            | 375                        | 184,5        | 0,098    | 9          | 0,81         | 0,55             | 5,85   | 5,50   | 7,78   | 9,38    | 14,29   | 20,56   | 38,63    |
| 13 Train      | Par. | 19,5                    | 9,46     | Eudragit E | 33               | 0,01                         | 10            | 75                         | 50,1         | 0,191    | 11         | 1,14         | 0,54             | 2,97   | 5,52   | 9,13   | 14,52   | 25,64   | 34,54   | 58,69    |
| 14 Test       | Par. | 19,5                    | 9,46     | Eudragit E | 33               | 0,01                         | 10            | 225                        | 146,7        | 0,109    | 11         | 0,42         | 0,68             | 1,43   | 4,10   | 6,74   | 9,30    | 16,41   | 28,71   | 55,84    |
| 15 Train      | Par. | 19,5                    | 9,46     | Eudragit E | 33               | 0,01                         | 10            | 375                        | 161,8        | 0,105    | 11         | 0,38         | 0,68             | 4,15   | 3,65   | 5,70   | 8,61    | 15,81   | 24,97   | 52,17    |
| 16 Test       | Par. | 19,5                    | 9,46     | Eudragit E | 44               | 0,01                         | 10            | 75                         | 128,6        | 0,282    | 11         | 1,69         | 0,51             | 2,74   | 4,38   | 8,30   | 12,80   | 22,73   | 31,77   | 55,66    |
| 17 Train      | Par. | 19,5                    | 9,46     | Eudragit E | 44               | 0,01                         | 10            | 225                        | 192,4        | 0,131    | 11         | 0,77         | 0,55             | 1,70   | 4,53   | 7,21   | 10,55   | 17,07   | 24,09   | 44,89    |
| 18 Train      | Par. | 19,5                    | 9,46     | Eudragit E | 44               | 0,01                         | 10            | 375                        | 211,2        | 0,115    | 11         | 0,84         | 0,52             | 1,66   | 3,52   | 6,33   | 9,59    | 16,77   | 28,68   | 41,73    |
| 19 Validation | Dic. | 5,15                    | 4        | Eudragit L | 22               | 0,03                         | 4,6           | 75                         | 8            | 0,423    | 17         | 0,04         | 0,98             | 2,30   | 3,95   | 12,95  | 23,54   | 32,46   | 54,95   | 84,53    |
| 20 Test       | Dic. | 5,15                    | 4        | Eudragit L | 22               | 0,03                         | 4,6           | 225                        | 118,5        | 0,125    | 17         | 0,01         | 1,16             | 0,77   | 1,37   | 2,87   | 6,16    | 12,53   | 27,13   | 54,17    |

|    |            |       |      |      |            |    |      |     |     |       |       |    |      |      |      |      |       |       |       |       |       |
|----|------------|-------|------|------|------------|----|------|-----|-----|-------|-------|----|------|------|------|------|-------|-------|-------|-------|-------|
| 21 | Train      | Dic.  | 5,15 | 4    | Eudragit L | 22 | 0,03 | 4,6 | 375 | 140,7 | 0,082 | 17 | 0,01 | 1,28 | 1,30 | 1,62 | 2,68  | 5,12  | 7,98  | 13,59 | 26,05 |
| 22 | Train      | Dic.  | 5,15 | 4    | Eudragit L | 33 | 0,03 | 4,6 | 75  | 34    | 0,236 | 17 | 1,44 | 0,43 | 3,79 | 4,63 | 10,60 | 11,68 | 14,13 | 21,69 | 32,92 |
| 23 | Train      | Dic.  | 5,15 | 4    | Eudragit L | 33 | 0,03 | 4,6 | 225 | 92    | 0,128 | 17 | 0,03 | 0,96 | 1,11 | 1,18 | 1,34  | 2,49  | 4,38  | 10,00 | 27,66 |
| 24 | Validation | Dic.  | 5,15 | 4    | Eudragit L | 33 | 0,03 | 4,6 | 375 | 134,4 | 0,058 | 17 | 0,04 | 0,91 | 0,86 | 1,14 | 1,59  | 2,52  | 5,18  | 13,60 | 32,40 |
| 25 | Train      | Dic.  | 5,15 | 4    | Eudragit L | 44 | 0,03 | 4,6 | 75  | 27,3  | 0,026 | 17 | 1,53 | 0,56 | 0,44 | 0,82 | 1,96  | 3,86  | 7,52  | 20,22 | 53,14 |
| 26 | Train      | Dic.  | 5,15 | 4    | Eudragit L | 44 | 0,03 | 4,6 | 225 | 97    | 0,137 | 17 | 0,18 | 0,79 | 0,42 | 0,58 | 1,19  | 2,47  | 4,80  | 12,17 | 42,56 |
| 27 | Train      | Dic.  | 5,15 | 4    | Eudragit L | 44 | 0,03 | 4,6 | 375 | 153,8 | 0,1   | 17 | 0,22 | 0,66 | 0,50 | 0,60 | 1,21  | 2,38  | 5,59  | 14,51 | 58,30 |
| 28 | Validation | Dic.  | 5,15 | 4    | Eudragit E | 22 | 0,01 | 10  | 75  | 94,4  | 0,092 | 14 | 1,37 | 0,26 | 2,52 | 4,70 | 6,25  | 8,20  | 10,13 | 12,14 | 16,73 |
| 29 | Test       | Dic.  | 5,15 | 4    | Eudragit E | 22 | 0,01 | 10  | 225 | 130,7 | 0,098 | 14 | 1,46 | 0,23 | 1,18 | 2,95 | 4,42  | 5,67  | 6,08  | 7,56  | 10,45 |
| 30 | Train      | Dic.  | 5,15 | 4    | Eudragit E | 22 | 0,01 | 10  | 375 | 173,7 | 0,113 | 14 | 1,45 | 0,22 | 1,76 | 4,05 | 5,44  | 7,09  | 8,19  | 9,55  | 12,33 |
| 31 | Train      | Dic.  | 5,15 | 4    | Eudragit E | 33 | 0,01 | 10  | 75  | 57,4  | 0,21  | 12 | 1,71 | 0,27 | 3,59 | 4,45 | 5,44  | 6,23  | 7,24  | 9,43  | 12,55 |
| 32 | Train      | Dic.  | 5,15 | 4    | Eudragit E | 33 | 0,01 | 10  | 225 | 102,6 | 0,101 | 12 | 0,90 | 0,35 | 1,37 | 3,15 | 4,16  | 4,92  | 6,35  | 8,62  | 11,55 |
| 33 | Train      | Dic.  | 5,15 | 4    | Eudragit E | 33 | 0,01 | 10  | 375 | 153,8 | 0,08  | 12 | 0,93 | 0,34 | 1,48 | 2,53 | 4,24  | 5,11  | 6,06  | 7,94  | 10,72 |
| 34 | Test       | Dic.  | 5,15 | 4    | Eudragit E | 44 | 0,01 | 10  | 75  | 102,9 | 0,147 | 9  | 1,60 | 0,33 | 1,57 | 3,55 | 4,47  | 5,10  | 6,07  | 7,01  | 8,94  |
| 35 | Test       | Dic.  | 5,15 | 4    | Eudragit E | 44 | 0,01 | 10  | 225 | 160,6 | 0,121 | 9  | 1,05 | 0,32 | 1,70 | 3,86 | 4,05  | 4,50  | 5,18  | 6,03  | 7,72  |
| 36 | Validation | Dic.  | 5,15 | 4    | Eudragit E | 44 | 0,01 | 10  | 375 | 201   | 0,046 | 9  | 1,56 | 0,29 | 1,40 | 3,74 | 3,64  | 4,72  | 4,85  | 5,25  | 6,99  |
| 37 | Train      | Acec. | 8,4  | 3,44 | Eudragit L | 22 | 0,03 | 4,6 | 75  | 13,5  | 0,279 | 41 | 0,42 | 0,73 | 1,00 | 1,26 | 3,04  | 6,70  | 13,98 | 25,53 | 49,32 |
| 38 | Train      | Acec. | 8,4  | 3,44 | Eudragit L | 22 | 0,03 | 4,6 | 225 | 68,2  | 0,077 | 41 | 0,05 | 0,93 | 0,68 | 1,80 | 3,79  | 7,03  | 11,98 | 19,34 | 43,03 |
| 39 | Test       | Acec. | 8,4  | 3,44 | Eudragit L | 22 | 0,03 | 4,6 | 375 | 103,6 | 0,067 | 41 | 0,09 | 0,89 | 1,02 | 1,63 | 4,38  | 7,10  | 10,97 | 18,10 | 40,34 |
| 40 | Train      | Acec. | 8,4  | 3,44 | Eudragit L | 33 | 0,03 | 4,6 | 75  | 22,9  | 0,232 | 41 | 0,13 | 0,88 | 1,72 | 2,20 | 3,71  | 7,58  | 16,05 | 29,45 | 74,91 |
| 41 | Train      | Acec. | 8,4  | 3,44 | Eudragit L | 33 | 0,03 | 4,6 | 225 | 65,8  | 0,104 | 41 | 0,19 | 0,83 | 0,70 | 1,39 | 2,87  | 6,06  | 12,11 | 40,87 | 74,86 |
| 42 | Validation | Acec. | 8,4  | 3,44 | Eudragit L | 33 | 0,03 | 4,6 | 375 | 71,3  | 0,097 | 41 | 0,08 | 0,89 | 0,37 | 1,12 | 1,56  | 4,01  | 9,36  | 24,38 | 54,10 |
| 43 | Validation | Acec. | 8,4  | 3,44 | Eudragit L | 44 | 0,03 | 4,6 | 75  | 15,2  | 0,027 | 41 | 0,25 | 0,73 | 0,51 | 2,58 | 8,49  | 13,88 | 21,22 | 42,42 | 85,16 |
| 44 | Train      | Acec. | 8,4  | 3,44 | Eudragit L | 44 | 0,03 | 4,6 | 225 | 90,7  | 0,086 | 41 | 0,20 | 0,74 | 0,19 | 0,53 | 1,37  | 3,86  | 9,33  | 18,27 | 47,89 |
| 45 | Train      | Acec. | 8,4  | 3,44 | Eudragit L | 44 | 0,03 | 4,6 | 375 | 116,7 | 0,06  | 41 | 0,21 | 0,73 | 0,30 | 0,83 | 2,21  | 5,24  | 11,42 | 23,10 | 57,08 |
| 46 | Validation | Acec. | 8,4  | 3,44 | Eudragit E | 22 | 0,01 | 10  | 75  | 93,4  | 0,106 | 46 | 0,04 | 0,59 | 0,90 | 1,20 | 2,21  | 4,65  | 8,76  | 13,97 | 23,18 |
| 47 | Train      | Acec. | 8,4  | 3,44 | Eudragit E | 22 | 0,01 | 10  | 225 | 159,1 | 0,038 | 46 | 0,01 | 0,76 | 0,55 | 1,22 | 1,60  | 2,09  | 2,66  | 3,78  | 7,21  |
| 48 | Test       | Acec. | 8,4  | 3,44 | Eudragit E | 22 | 0,01 | 10  | 375 | 164,7 | 0,014 | 46 | 0,01 | 0,72 | 2,66 | 1,49 | 1,84  | 1,82  | 2,24  | 3,34  | 6,37  |
| 49 | Test       | Acec. | 8,4  | 3,44 | Eudragit E | 33 | 0,01 | 10  | 75  | 67,6  | 0,141 | 47 | 0,21 | 0,46 | 0,48 | 0,70 | 1,23  | 1,99  | 2,80  | 3,85  | 5,76  |
| 50 | Train      | Acec. | 8,4  | 3,44 | Eudragit E | 33 | 0,01 | 10  | 225 | 87,5  | 0,068 | 47 | 0,07 | 0,55 | 0,20 | 0,46 | 0,66  | 0,90  | 1,43  | 2,18  | 3,73  |

|        |                |       |     |      |                |    |      |    |     |       |       |    |      |      |          |      |      |      |      |      |      |
|--------|----------------|-------|-----|------|----------------|----|------|----|-----|-------|-------|----|------|------|----------|------|------|------|------|------|------|
| 5<br>1 | Validati<br>on | Acec. | 8,4 | 3,44 | Eudra<br>git E | 33 | 0,01 | 10 | 375 | 143,6 | 0,071 | 47 | 0,08 | 0,49 | 0,3<br>2 | 0,52 | 0,65 | 0,79 | 1,13 | 1,65 | 2,89 |
| 5<br>2 | Test           | Acec. | 8,4 | 3,44 | Eudra<br>git E | 44 | 0,01 | 10 | 75  | 131,2 | 0,102 | 49 | 0,28 | 0,61 | 0,2<br>0 | 0,27 | 0,42 | 0,64 | 0,96 | 1,49 | 2,81 |
| 5<br>3 | Train          | Acec. | 8,4 | 3,44 | Eudra<br>git E | 44 | 0,01 | 10 | 225 | 187,9 | 0,011 | 49 | 0,17 | 0,51 | 0,2<br>2 | 0,20 | 0,24 | 0,33 | 0,57 | 1,05 | 2,43 |
| 5<br>4 | Train          | Acec. | 8,4 | 3,44 | Eudra<br>git E | 44 | 0,01 | 10 | 375 | 192,8 | 0,011 | 49 | 0,21 | 0,47 | 0,2<br>6 | 0,21 | 0,24 | 0,32 | 0,44 | 0,93 | 2,06 |

\*22, 33 and 44 % corresponds with 25:75, 50:50 and 75:25 Eudragit:PVC ratio, respectively.

Full equations:

$$y_1 = 110.12 + 47.05x_1 + 9.44x_1^2 + 19.34x_2 - 0.44x_2^2 - 10.12x_3 + 0.36x_3^2 - 29.48x_4 + 2.50x_1x_2 - 1.64x_1x_2^2 + 2.42x_1^2x_2 + 2.31x_1^2x_2^2 - 6.44x_1x_3 + 4.80x_1x_3^2 - 4.22x_1^2x_3 - 3.54x_1^2x_3^2 + 4.54x_1x_4 + 3.20x_1^2x_4 + 1.33x_2x_3 - 3.47x_2x_3^2 + 1.30x_2^2x_3 + 0.56x_2^2x_3^2 - 11.48x_2x_4 - 2.23x_2^2x_4 - 2.32x_3x_4 + 6.83x_3^2x_4 \quad (S1)$$

R<sup>2</sup>=0.9756 adj R<sup>2</sup>=0.9537 MS Residual: 141.79

$$y_2 = 0.132 - 0.054x_1 - 0.022x_1^2 - 0.009x_2 + 0.006x_2^2 - 0.043x_3 - 0.0003x_3^2 + 0.018x_4 + 0.022x_1x_2 - 0.018x_1x_2^2 + 0.004x_1^2x_2 - 0.006x_1^2x_2^2 + 0.009x_1x_3 + 0.002x_1x_3^2 + 0.010x_1^2x_3 + 0.009x_1^2x_3^2 - 0.014x_1x_4 - 0.004x_1^2x_4 - 0.029x_2x_3 - 0.006x_2x_3^2 + 0.006x_2^2x_3 + 0.009x_2^2x_3^2 - 0.009x_2x_4 + 0.016x_2^2x_4 + 0.007x_3x_4 - 0.0006x_3^2x_4 \quad (S2)$$

R<sup>2</sup>=0.7928 adj R<sup>2</sup>=0.6079 MS Res=0.0028

$$y_3 = 0.936 - 0.381x_1 - 0.283x_1^2 + 0.092x_2 + 0.038x_2^2 - 0.804x_3 - 0.026x_3^2 + 0.185x_4 - 0.011x_1x_2 - 0.241x_1x_2^2 - 0.033x_1^2x_2 - 0.042x_1^2x_2^2 + 0.403x_1x_3 + 0.113x_1x_3^2 + 0.289x_1^2x_3 + 0.046x_1^2x_3^2 - 0.208x_1x_4 - 0.181x_1^2x_4 - 0.242x_2x_3 - 0.137x_2x_3^2 - 0.097x_2^2x_3 - 0.063x_2^2x_3^2 + 0.197x_2x_4 + 0.116x_2^2x_4 - 0.440x_3x_4 - 0.427x_3^2x_4 \quad (S3)$$

R<sup>2</sup>=0.7801 adj R<sup>2</sup>=0.5838 MS Res=0.6453

Supplementary Figures for FT-IR analysis:

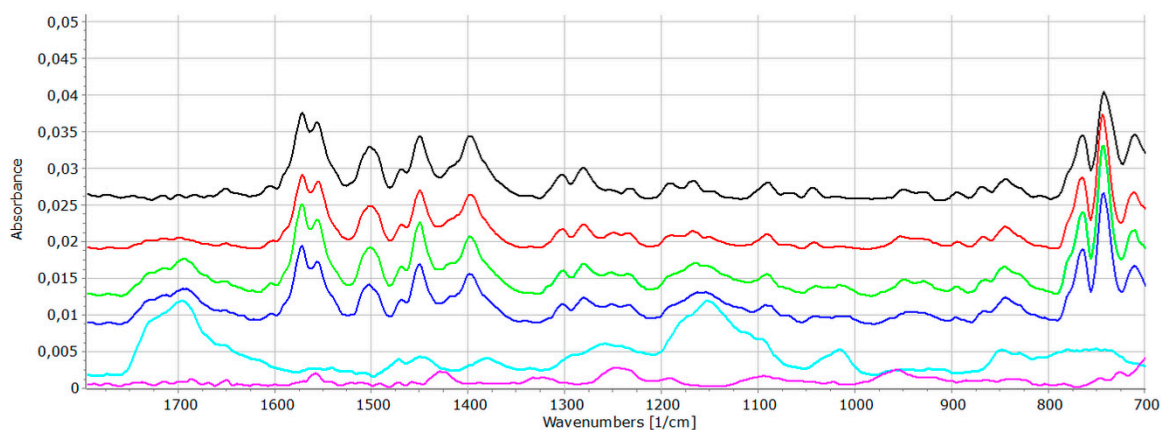

**Figure S1.** FT-IR spectra (650-1800 cm<sup>-1</sup> range) of the DIS (black); DIS-PVC:EL 75:25 (red); DIS-PVC:EL 50:50 (green); DIS-PVC:EL 25:75 (deep blue); EL (light blue) and PVC (purple) samples.

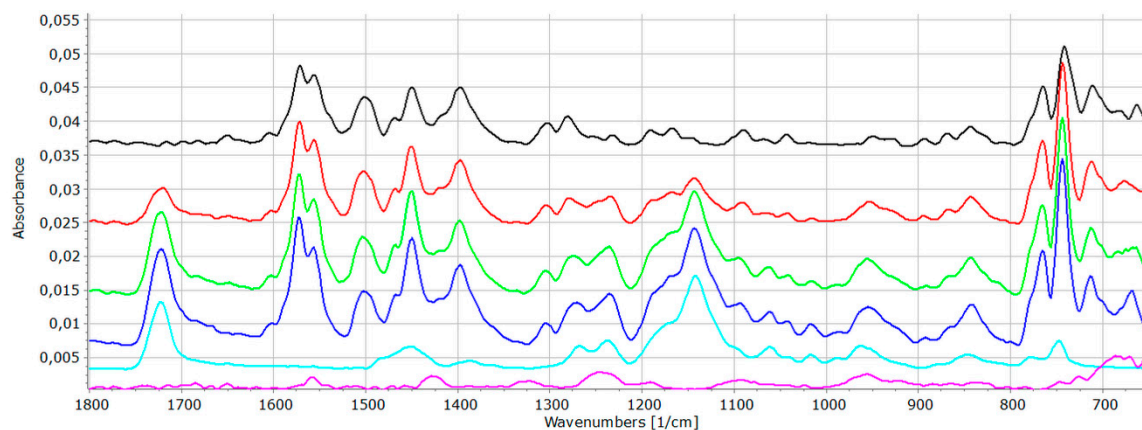

**Figure S2.** FT-IR spectra (650-1800  $\text{cm}^{-1}$  range) of the DIS (black); DIS-PVC:EE 75:25 (red); DIS-PVC:EE 50:50 (green); DIS-PVC:EE 25:75 (deep blue); EE (light blue) and PVC (purple) samples.

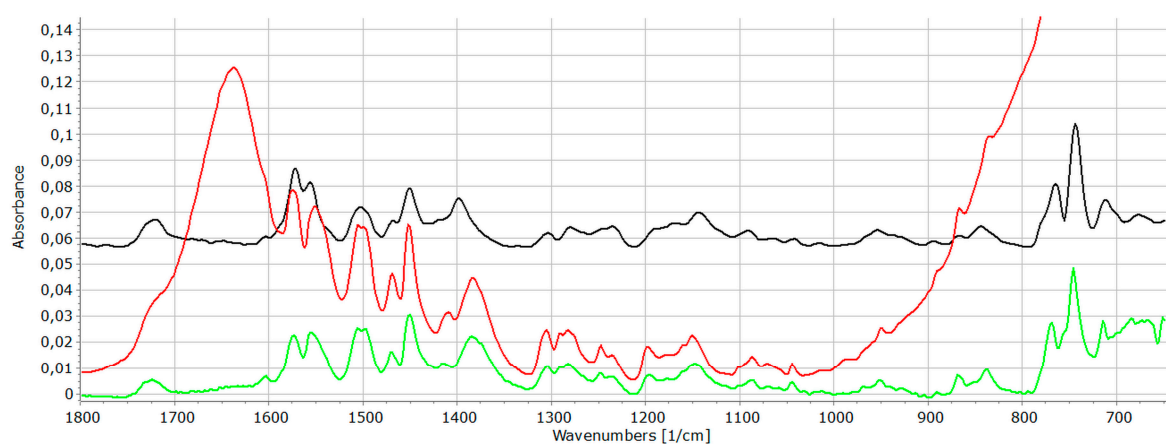

**Figure S3.** FT-IR spectra of Dis-PVC:EE 75:25 samples: original (black), dipped (red), and dried (green).

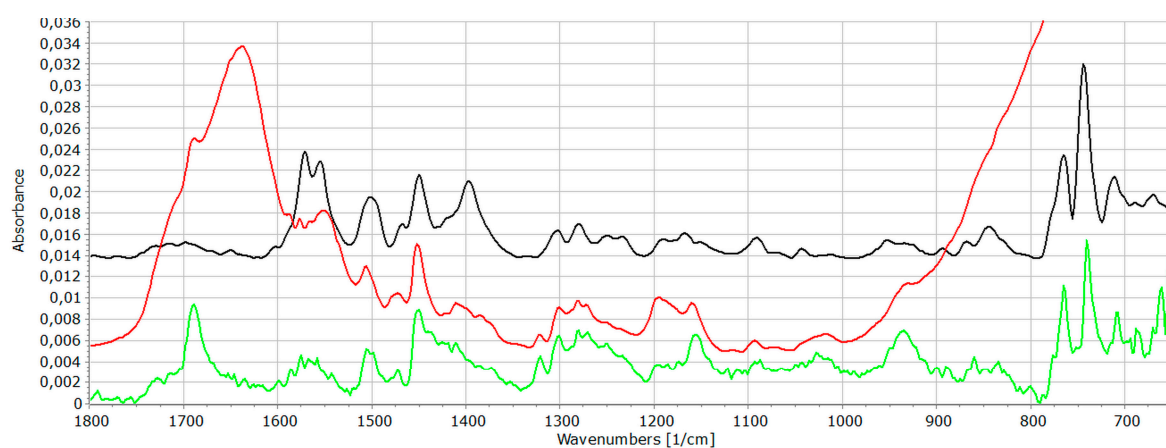

**Figure S4.** FT-IR spectra of Dis-PVC:EL 75:25 samples: original (black), dipped (red), and dried (green).

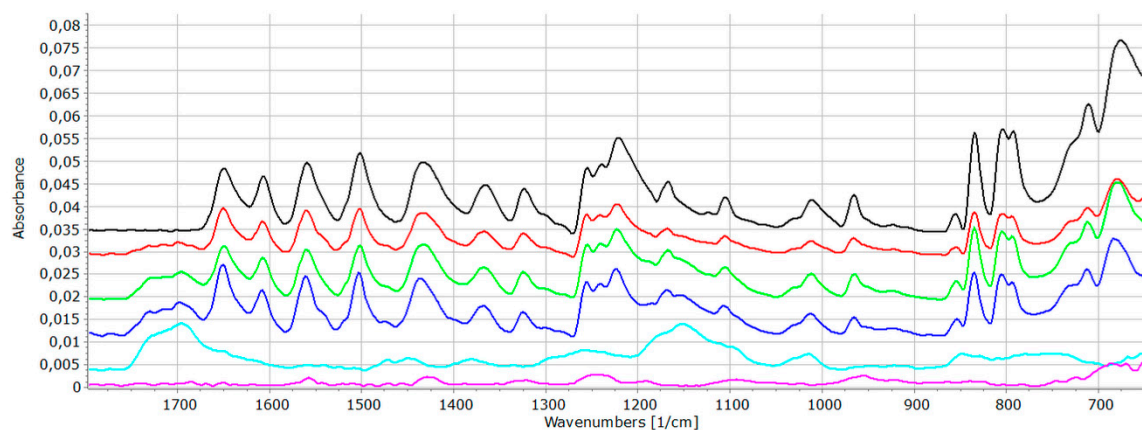

**Figure S5.** FT-IR spectra (650-1800  $\text{cm}^{-1}$  range) of the PAR (black); PAR-PVC:EL 75:25 (red); PAR-PVC:EL 50:50 (green); PAR-PVC:EL 25:75 (deep blue); EL (light blue) and PVC (purple) samples.

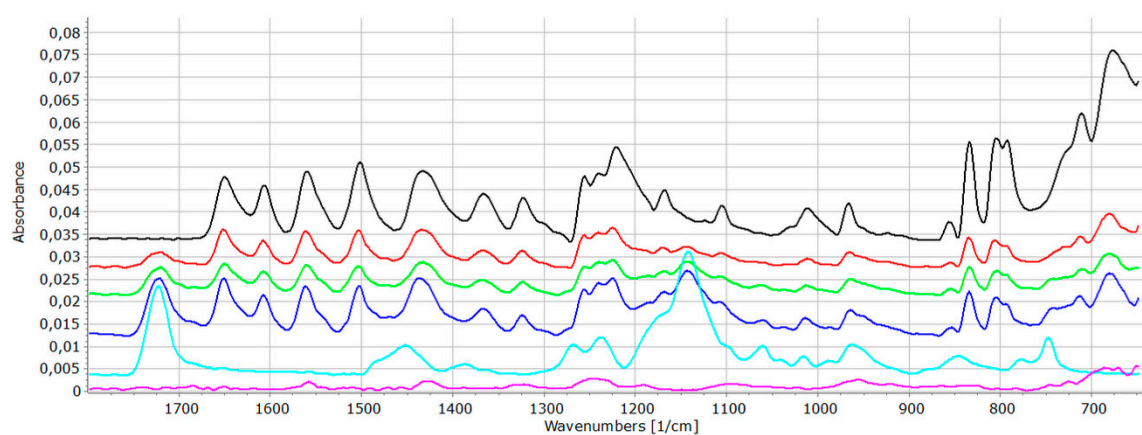

**Figure S6.** FT-IR spectra (650-1800  $\text{cm}^{-1}$  range) of the PAR (black); PAR-PVC:EE 75:25 (red); PAR-PVC:EE 50:50 (green); PAR-PVC:EE 25:75 (deep blue); EE (light blue) and PVC (purple) samples.

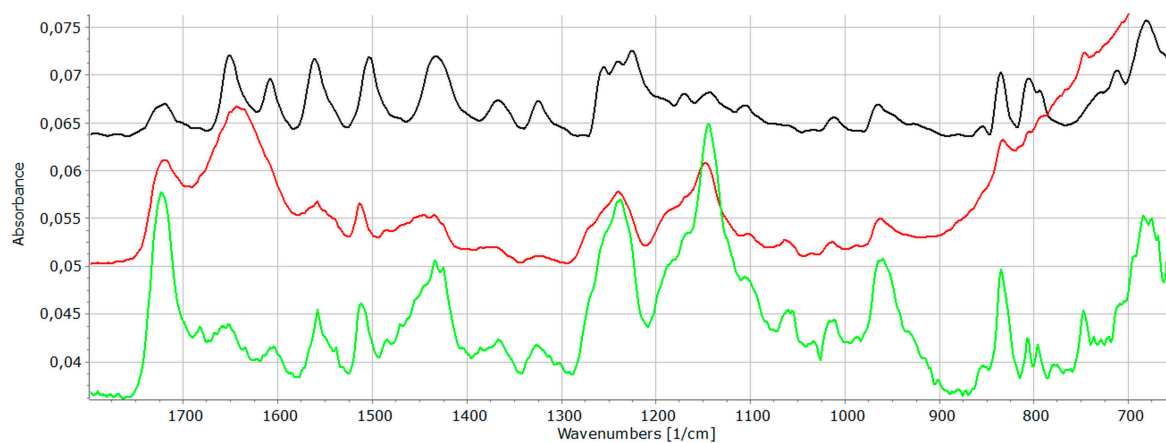

**Figure S7.** FT-IR spectra of Par-PVC:EE 75:25 samples: original (black), dipped (red), and dried (green).



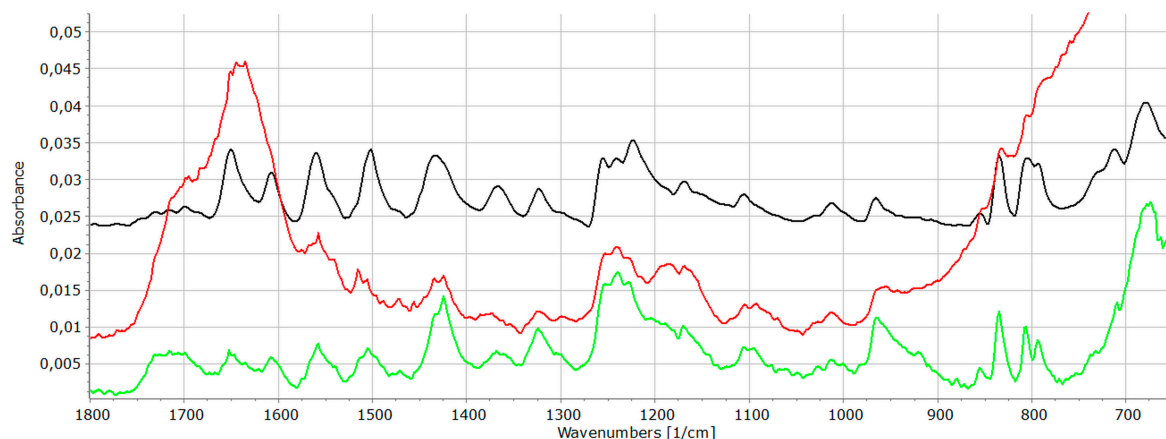

**Figure S8.** FT-IR spectra of Par-PVC:EL 75:25 samples: original (black), dipped (red), and dried (green).

Supplementary data for 1 week long dissolution study:

**Table S2.** Release rates and release exponents derived from the Korsmeyer-Peppas model (1-week-long test).

| Composition | Eudragit/PVC ratio (%/%) | Pressure (MPa) | R <sup>2</sup> | k      | n      |
|-------------|--------------------------|----------------|----------------|--------|--------|
| PAR-PVC-EE  | 25/75                    | 375            | 0.9576         | 4.1992 | 0.3206 |
| ACE-PVC-EE  | 75/25                    | 375            | 0.9918         | 0.0495 | 0.532  |
| DIC-PVC-EE  | 25/75                    | 375            | 0.8327         | 3.1193 | 0.2434 |
| DIC-PVC-EL  | 50/50                    | 225            | 0.97           | 0.2829 | 0.6428 |

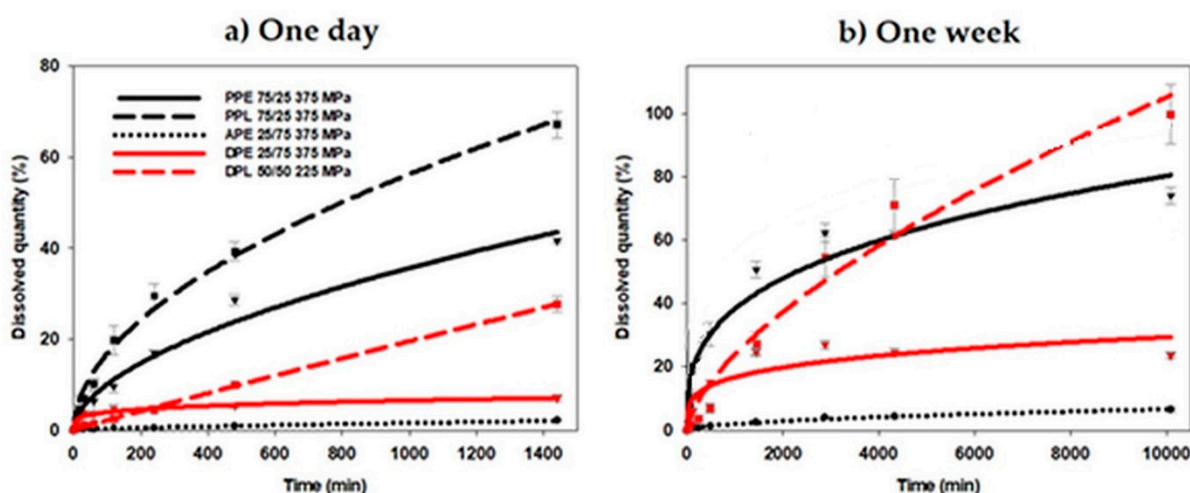

**Figure S9.** Drug release from various matrices: effect of the drug and polymer properties (a) and effect of the composition and compression force for PAR (b), DIS (c) and ACE (d) containing matrices.

There the results met the expectations, the ACE containing matrix (APE) proved to be the most retentive, liberating around 2% on one day, and reaching 6.5% by the end of a week. As for DIS with EE (DPE), the 24-hour test provided nearly 7% and the one-week test a 23.6% value, while with the EL (DPL) 27.7% was released in one day and 99.85% was reached by the end of the week. PAR with EE (PPE) liberated 42% of the drug during one and 74% in seven days, while if the API was mixed with EL (PPL), the released amount was 67% and 100%, in one day and one week, respectively. Nevertheless, it should be

noted that in this latter case the liberation process reached the maximum 100% till the end of the second day, and after then the drug started to adhere to the silicon tubing of the dissolution device resulting decreasing concentrations, therefore this sample was withdrawn from the one-week dissolution study.

Nevertheless, the results confirm, that strong drug-matrix interactions may help the prolongation of the drug release for several months.

Supplementary Material for ANN modelling:

**Table S3.** Performance of the neurons.

| Number of hidden neurons |      | Approach 1 |        | Approach 2 |        | Approach 3 |        | Approach 4 |          | Approach 5 |          | Approach 6 |         |
|--------------------------|------|------------|--------|------------|--------|------------|--------|------------|----------|------------|----------|------------|---------|
|                          |      | Perf.      | Error  | Perf.      | Error  | Perf.      | Error  | Perf.      | Error    | Perf.      | Error    | Perf.      | Error   |
| I+O-3                    | Mean | 0,8777     | 0,3995 | 0,8608     | 0,3103 | 0,8357     | 0,3901 | 0,9304     | 107,2409 | 0,9238     | 162,4238 | 0,9293     | 99,3636 |
|                          | SD   | 0,0229     | 0,0250 | 0,0368     | 0,0263 | 0,0852     | 0,0538 | 0,0064     | 20,2784  | 0,0039     | 24,6286  | 0,0058     | 11,6035 |
| I+O-2                    | Mean | 0,8832     | 0,3767 | 0,8808     | 0,4548 | 0,8711     | 0,3875 | 0,9240     | 121,0832 | 0,9186     | 154,0890 | 0,9297     | 91,7769 |
|                          | SD   | 0,0071     | 0,0959 | 0,0020     | 0,0630 | 0,0264     | 0,0410 | 0,0083     | 18,1608  | 0,0050     | 15,8342  | 0,0018     | 7,4322  |
| I+O-1                    | Mean | 0,8704     | 0,3086 | 0,8959     | 0,3682 | 0,8826     | 0,3459 | 0,9226     | 101,3835 | 0,9230     | 144,6181 | 0,9294     | 88,6256 |
|                          | SD   | 0,0293     | 0,0779 | 0,0214     | 0,0978 | 0,0184     | 0,0464 | 0,0075     | 15,5180  | 0,0020     | 10,6401  | 0,0051     | 5,0336  |
| I+O                      | Mean | 0,8793     | 0,4695 | 0,8825     | 0,3900 | 0,8885     | 0,3806 | 0,9254     | 116,9167 | 0,9181     | 142,9717 | 0,9273     | 92,8801 |
|                          | SD   | 0,0151     | 0,0940 | 0,0144     | 0,0939 | 0,0234     | 0,0711 | 0,0078     | 21,1997  | 0,0028     | 8,5369   | 0,0047     | 10,5143 |
| I+O+1                    | Mean | 0,8562     | 0,3349 | 0,8875     | 0,4569 | 0,8839     | 0,3660 | 0,9314     | 118,1403 | 0,9217     | 152,1861 | 0,9281     | 99,1262 |
|                          | SD   | 0,0209     | 0,0620 | 0,0062     | 0,1090 | 0,0202     | 0,0445 | 0,0065     | 25,2726  | 0,0017     | 9,1558   | 0,0026     | 4,7649  |

**Table S4.** Results of the global sensitivity analysis.

| Modelling type               | Approach 1    |      | Approach 2    |      | Approach 3    |       | Approach 4     |      | Approach 5     |      | Approach 6     |      |
|------------------------------|---------------|------|---------------|------|---------------|-------|----------------|------|----------------|------|----------------|------|
|                              | Kinetic based |      | Kinetic based |      | Kinetic based |       | Point-to-point |      | Point-to-point |      | Point-to-point |      |
| Input variable               | Mean          | SD   | Mean          | SD   | Mean          | SD    | Mean           | SD   | Mean           | SD   | Mean           | SD   |
| Drug                         | 5,12          | 3,06 |               |      |               |       | 8,21           | 1,56 |                |      |                |      |
| Drug solubility (mg/ml)      |               |      | 1,99          | 1,94 | 2,30          | 2,91  |                |      | 2,11           | 0,20 | 2,45           | 0,22 |
| Drug pKa                     |               |      | 1,81          | 2,17 | 2,09          | 2,89  |                |      | 1,41           | 0,12 | 1,37           | 0,10 |
| Excipient                    | 1,05          | 0,13 |               |      |               |       | 1,00           | 0,00 |                |      |                |      |
| Excipient solubility (mg/ml) |               |      | 1,21          | 0,49 | 5,95          | 26,47 |                |      | 1,53           | 0,19 | 1,30           | 0,13 |
| Excipient pKa                |               |      | 1,40          | 0,62 | 15,39         | 75,30 |                |      | 2,86           | 0,37 | 2,52           | 0,22 |
| Excipient amount (%)         | 1,02          | 0,06 | 1,01          | 0,06 | 1,25          | 0,92  | 1,62           | 0,46 | 1,05           | 0,07 | 1,26           | 0,07 |
| Compression pressure         | 1,38          | 0,22 | 1,46          | 0,37 | 1,37          | 0,94  | 1,56           | 0,27 | 1,25           | 0,06 | 1,00           | 0,03 |
| Hardness                     |               |      |               |      | 1,80          | 2,50  |                |      |                |      | 1,54           | 0,20 |
| Porosity                     |               |      |               |      | 1,28          | 0,74  |                |      |                |      | 1,23           | 0,05 |
| Peak Shift                   | 5,26          | 5,24 | 1,67          | 0,88 | 1,87          | 1,66  | 1,20           | 0,13 | 1,13           | 0,08 | 1,20           | 0,08 |
